# Supplementary material for: Social Isolation Changes and Long-Term Outcomes Among Older Adults
Source: PubMed Central journal article supplement (PMC11270134; doi:10.1001/jamanetworkopen.2024.24519), 2024-07-24
Supplement: jamanetwopen-e2424519-s001.pdf [file jamanetwopen-e2424519-s001.pdf]

## Supplemental Online Content

Lyu C, Siu K, Xu I, Osman I, Zhong J. Social isolation changes and long-term outcomes among older adults. *JAMA Netw Open*. 2024;7(7):e2424519. doi:10.1001/jamanetworkopen.2024.24519

**eFigure 1.** Flow chart of the study design

**eFigure 2.** The standardized mean difference for covariates

**eFigure 3.** The cumulative incidence curves of CVD and stroke for social isolation change from baseline to second social isolation measure and the social isolation status

**eFigure 4.** Unadjusted hazard ratios of changes in isolation on distal outcomes stratified by the social isolation status

**eFigure 5.** Sensitivity analysis 1: adjusted hazard ratios of changes in binary isolation group on distal outcomes stratified by the social isolation status

**eFigure 6.** Sensitivity analysis 2: Adjusted hazard ratios of changes in isolation group on distal outcomes among individuals who did not die within 2 years post second SII measurement

**eFigure 7.** Sensitivity analysis 3: Adjusted hazard ratios of changes in isolation group on distal outcomes stratified by the social isolation status incorporating HRS sampling weights

**eTable 1.** ICD-10 Diagnosis codes from Medicare Chronic Conditions Warehouse

**eTable 2.** Social Isolation Index change from baseline to second social isolation measurement stratified by isolation status

**eTable 3.** Demographic and clinical characteristics of the HRS analysis cohort by social isolation group from baseline to second social isolation measure

**eTable 4.** The hazard ratios of full covariates on distal outcomes stratified by the social isolation status

This supplemental material has been provided by the authors to give readers additional information about their work.

## Online-Only Supplementary Material

### **Efigure 1: Flow chart of the study design.**

The flow charts are listed for A) disability (ADL>0), B) Dementia (AD or ADRD), C) CVD (acute myocardial infarction, atrial fibrillation, congestive heart failure, ischemic heart disease or stroke) and D) stroke. In addition to the exclusion criteria in

**Figure 1**, we further excluded the individuals with no linked Medicare claims or with the outcome missing or the outcome before first measurement of social isolation.

A)

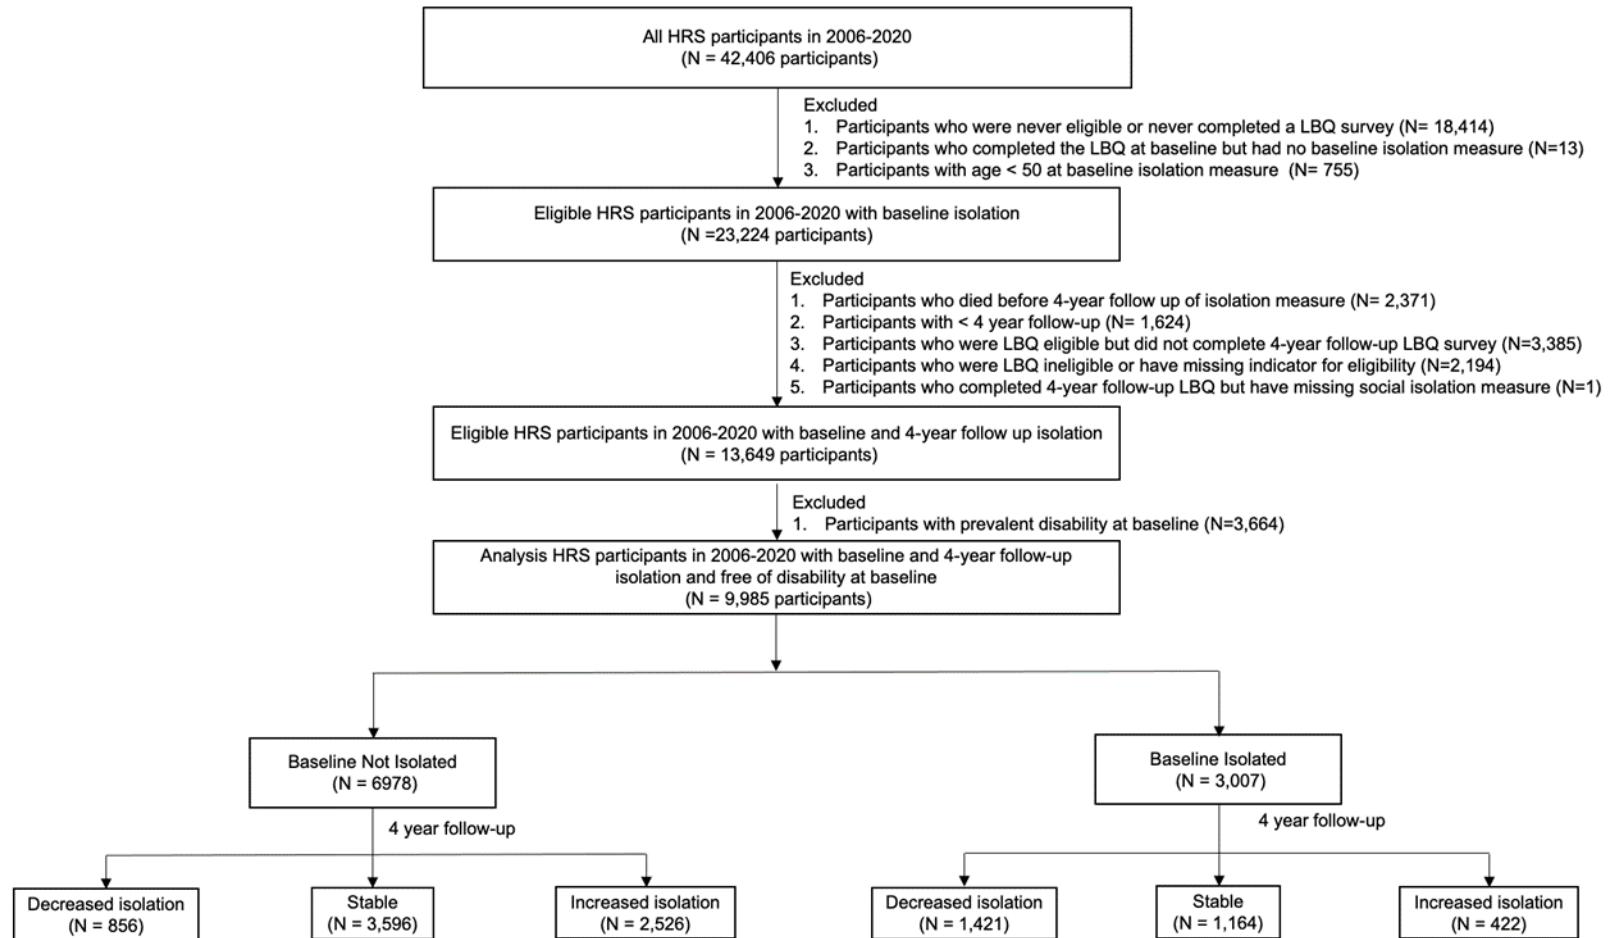

B)

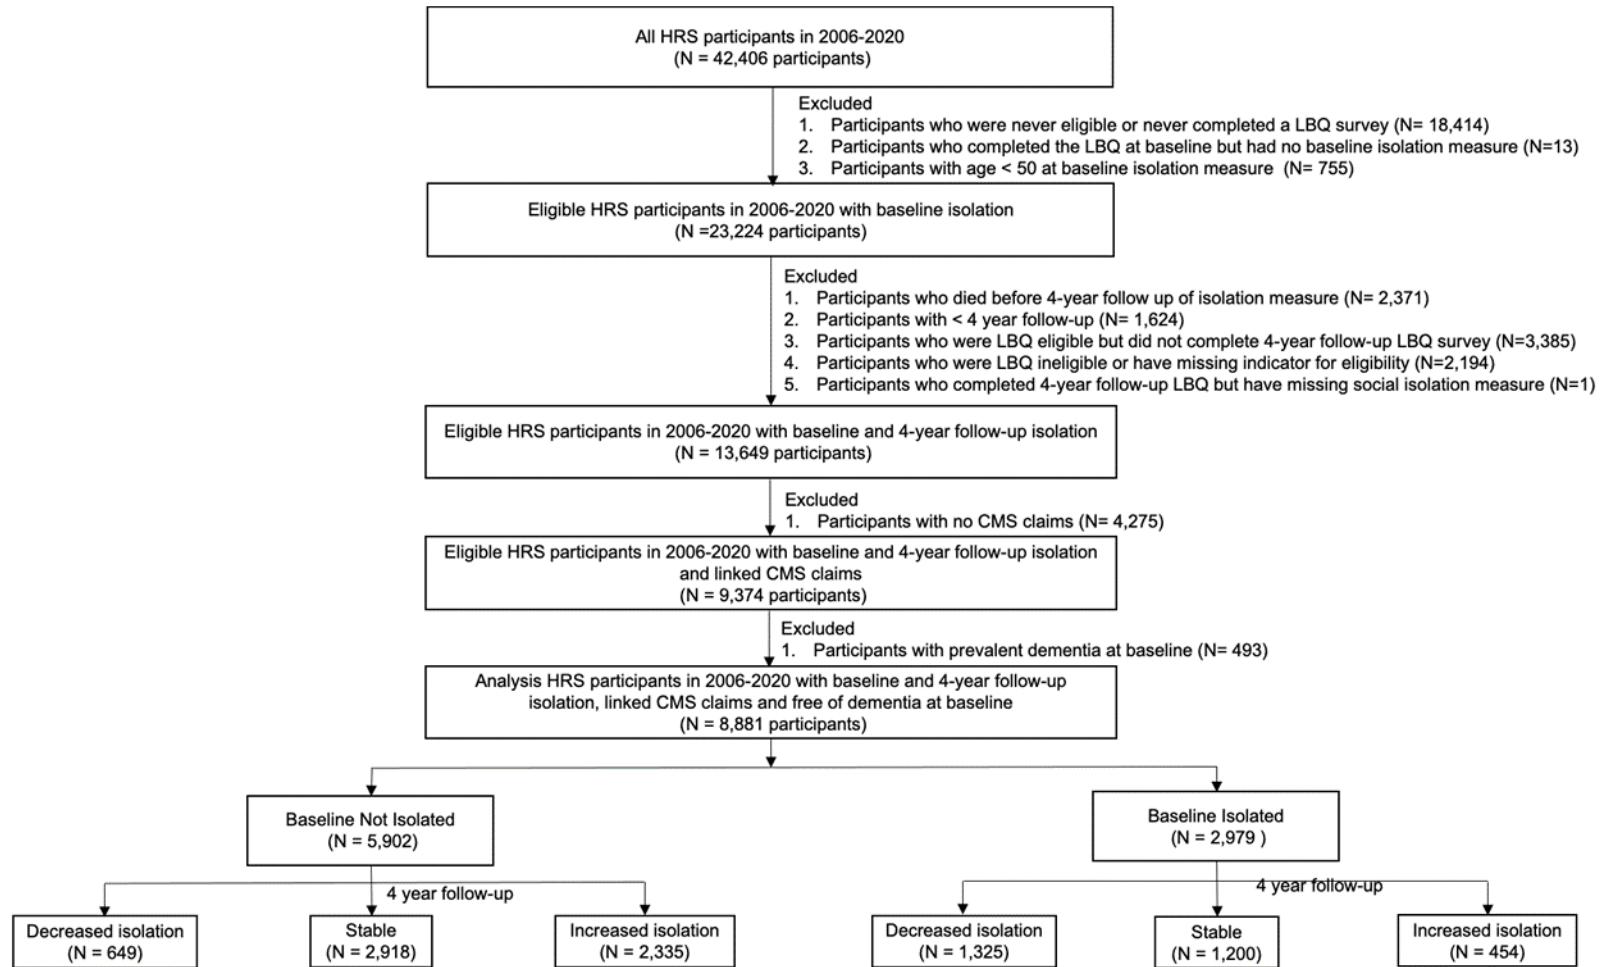

C)

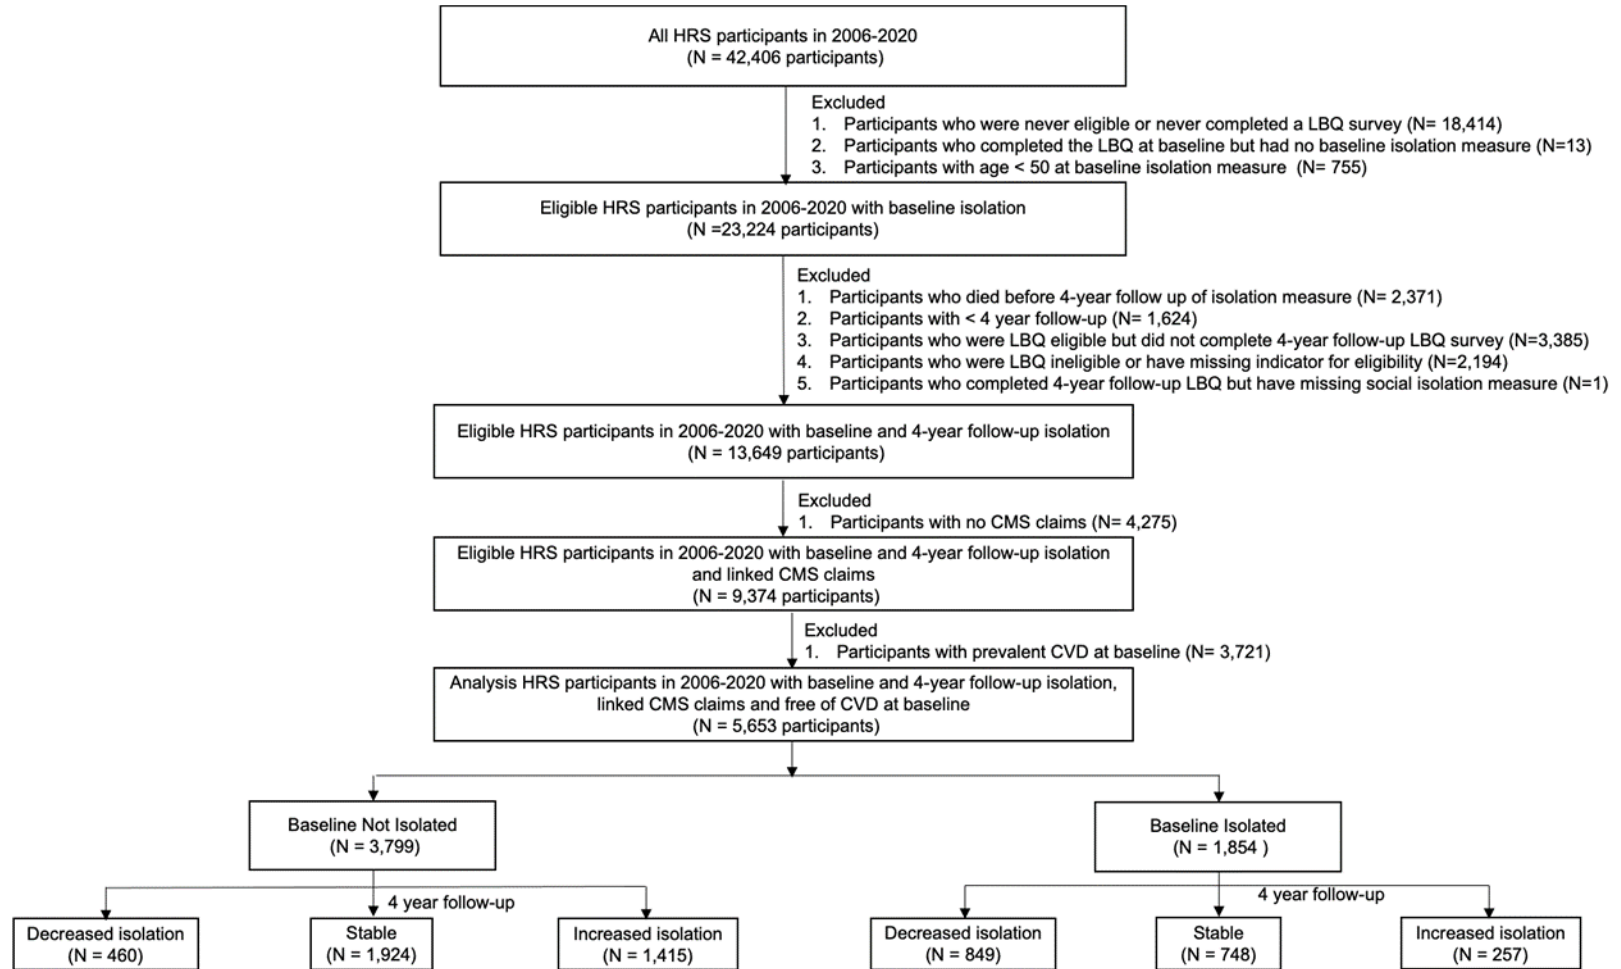

D)

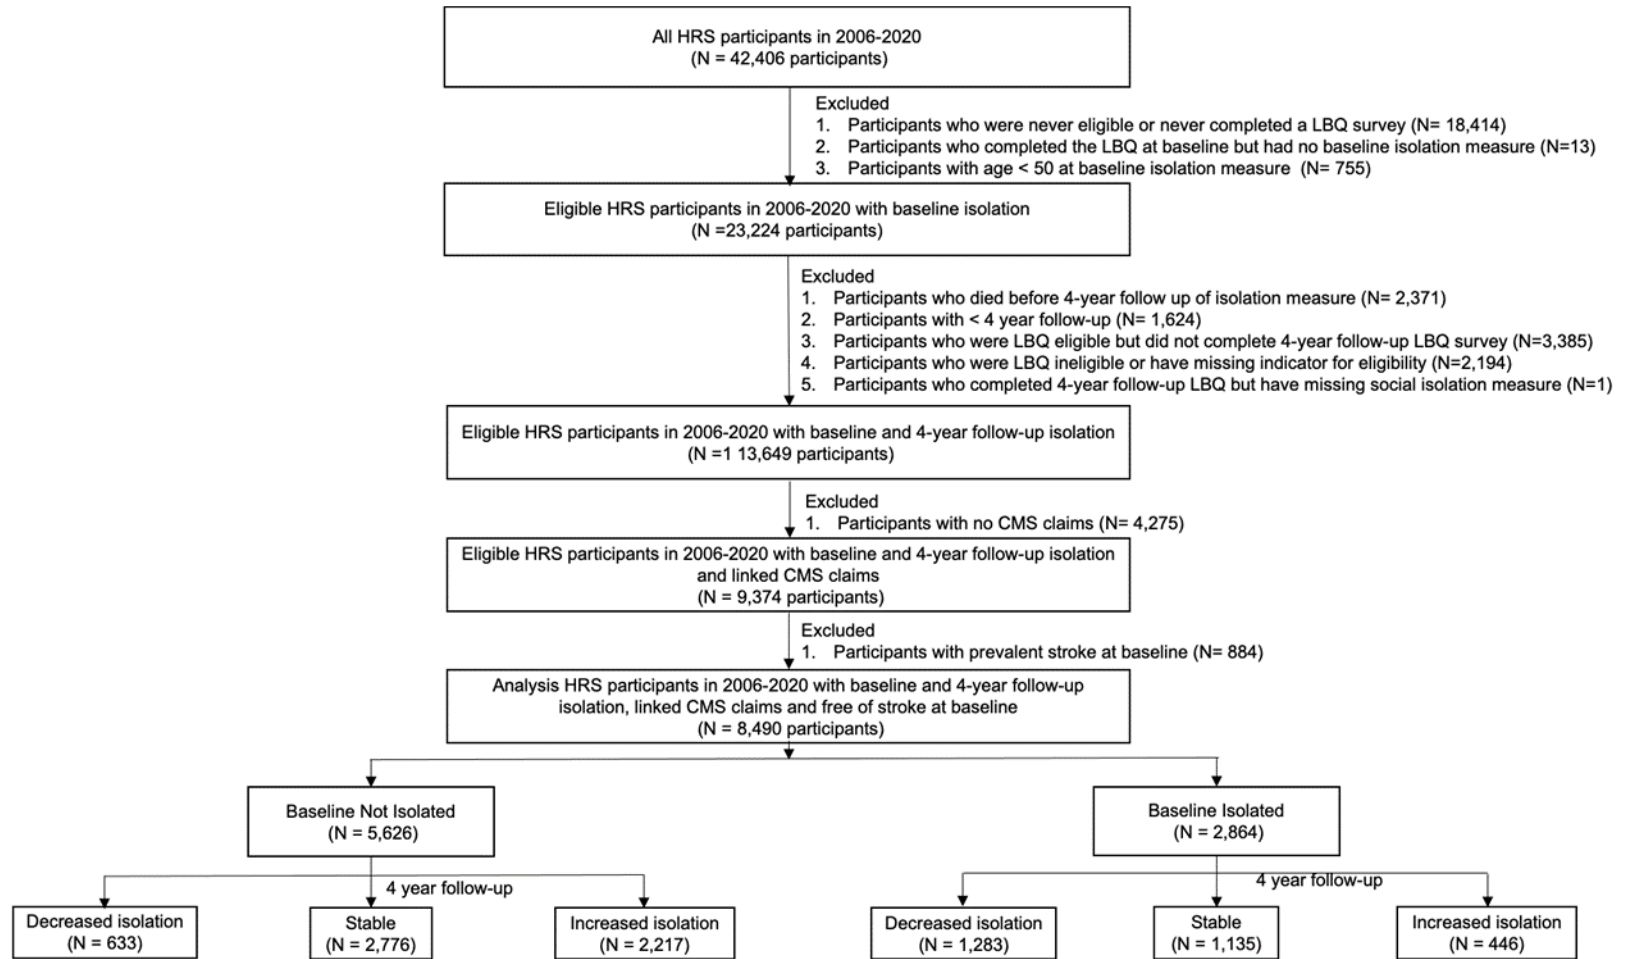

### Efigure 2: The standardized mean difference for covariates

The standardized mean difference (SMD) was calculated for each covariate before and after inverse probability of treatment weighting. The solid line refers to weighted SMD and the dash line represents the unadjusted one.

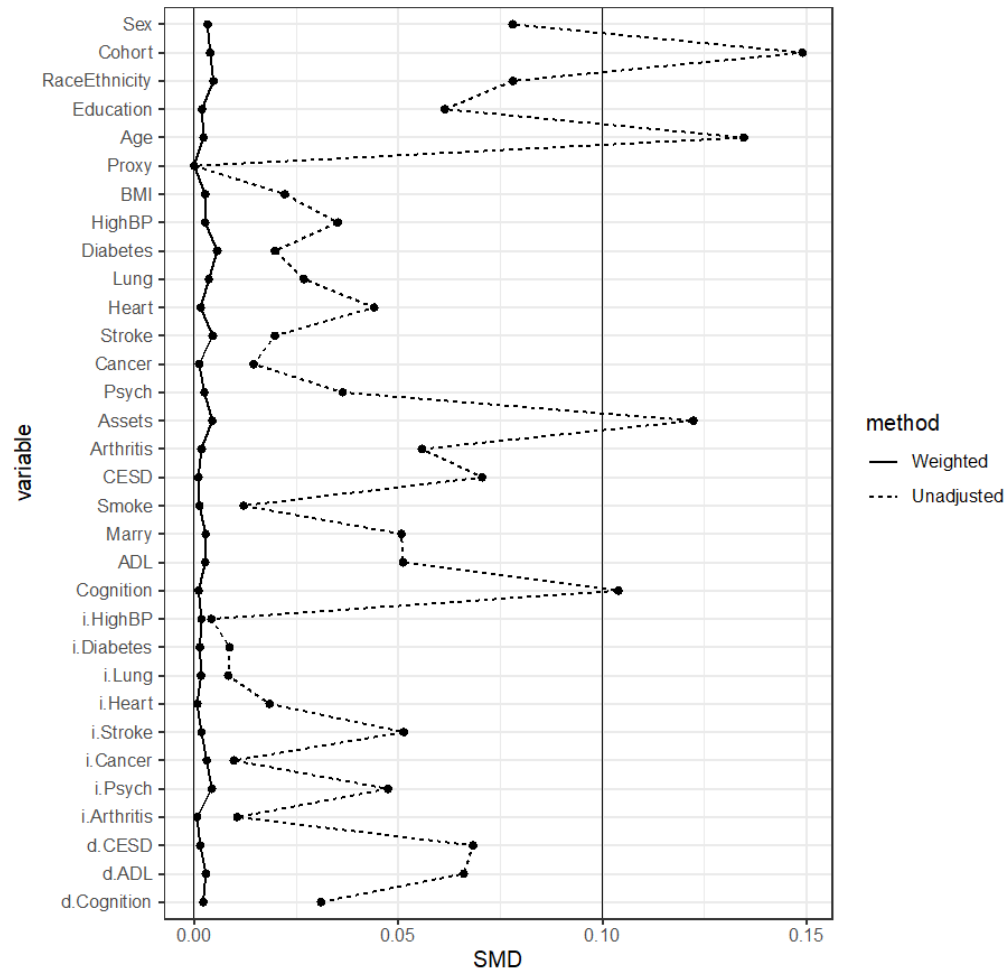



**Efigure 3: The cumulative incidence curves of CVD and stroke for social isolation change from baseline to second social isolation measure and the social isolation status.**

The outcomes include A-B) CVD; and C-D) stroke. The figures were stratified by the social isolation status: A, C) baseline non-isolation and B, D) baseline isolation. The x-axis of each figure is the year since second social isolation measure. The year since second social isolation measure is the 4 year later since the first measurement of social isolation. The curves are colored by the three isolation change groups from baseline to second social isolation measure (blue: decreased isolation, purple: stable and orange: increased isolation). The number of participants at risk at each time point were listed in the table below each figure.

A) Baseline Not Isolated CVD

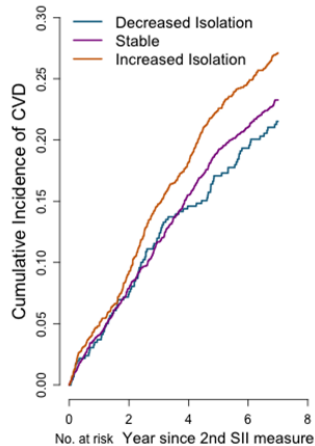

|      |      |      |      |                     |
|------|------|------|------|---------------------|
| 460  | 426  | 391  | 358  | Decreased Isolation |
| 1924 | 1772 | 1612 | 1443 | Stable              |
| 1415 | 1284 | 1142 | 1004 | Increased Isolation |

B) Baseline Isolated CVD

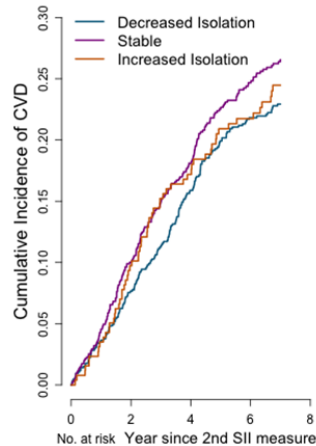

|     |     |     |     |                     |
|-----|-----|-----|-----|---------------------|
| 849 | 784 | 706 | 615 | Decreased Isolation |
| 748 | 673 | 600 | 524 | Stable              |
| 257 | 232 | 210 | 186 | Increased Isolation |

C) Baseline Not Isolated Stroke

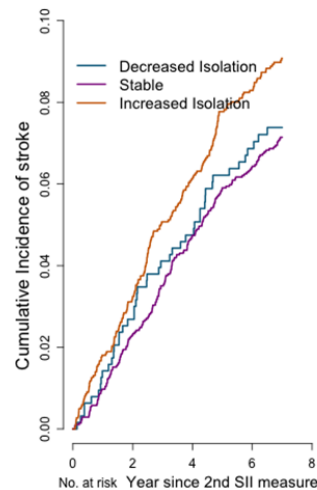

|      |      |      |      |                     |
|------|------|------|------|---------------------|
| 633  | 616  | 601  | 571  | Decreased Isolation |
| 2776 | 2712 | 2621 | 2481 | Stable              |
| 2217 | 2145 | 2055 | 1934 | Increased Isolation |

D) Baseline Isolated Stroke

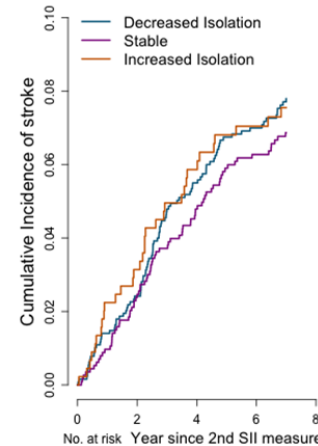

|      |      |      |      |                     |
|------|------|------|------|---------------------|
| 1283 | 1252 | 1196 | 1114 | Decreased Isolation |
| 1135 | 1107 | 1067 | 1006 | Stable              |
| 446  | 432  | 414  | 389  | Increased Isolation |

**Efigure 4: Unadjusted hazard ratios of changes in isolation on distal outcomes stratified by the social isolation status**

The hazard ratios (95% confident interval) between isolation change group are estimated for each outcome with stable social isolation as the reference group with no covariate adjustment nor IPTW use. The p-value column presents the p-values testing the corresponding HR of diabetes to the null hypothesis (HR=1).

### A) Baseline Not Isolated

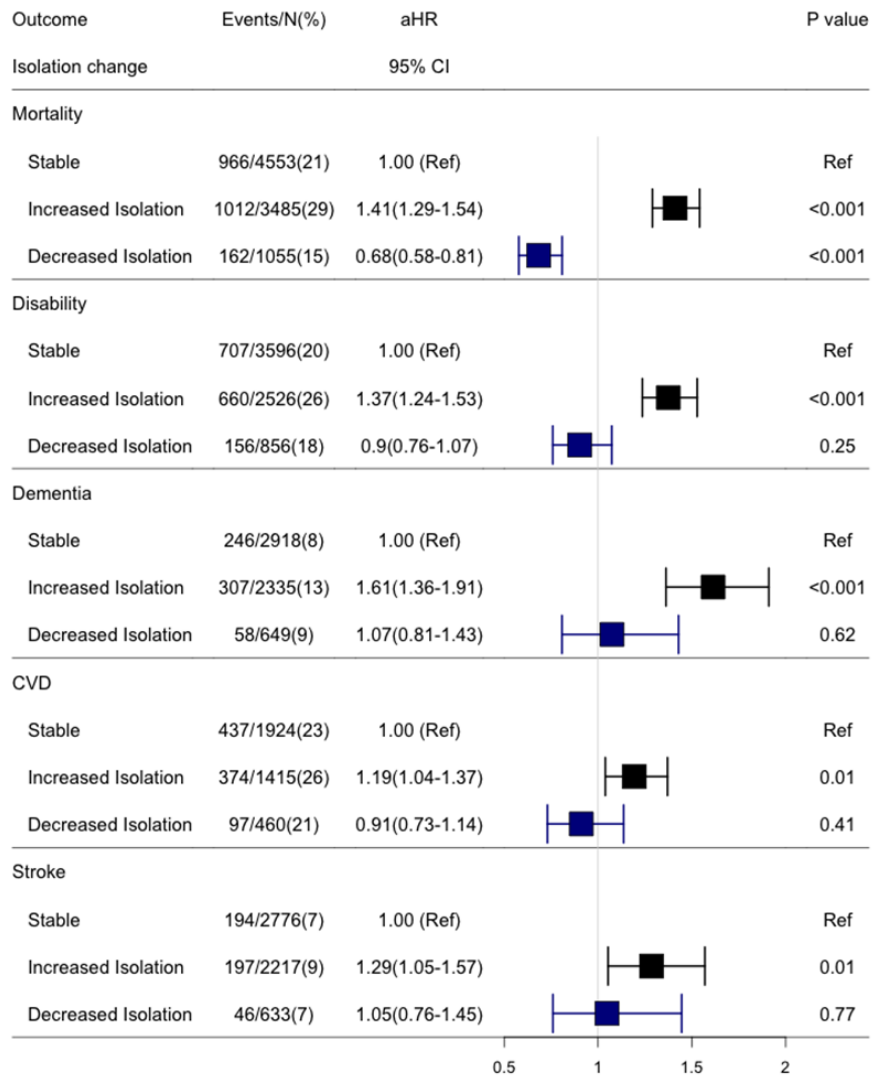

### B) Baseline Isolated

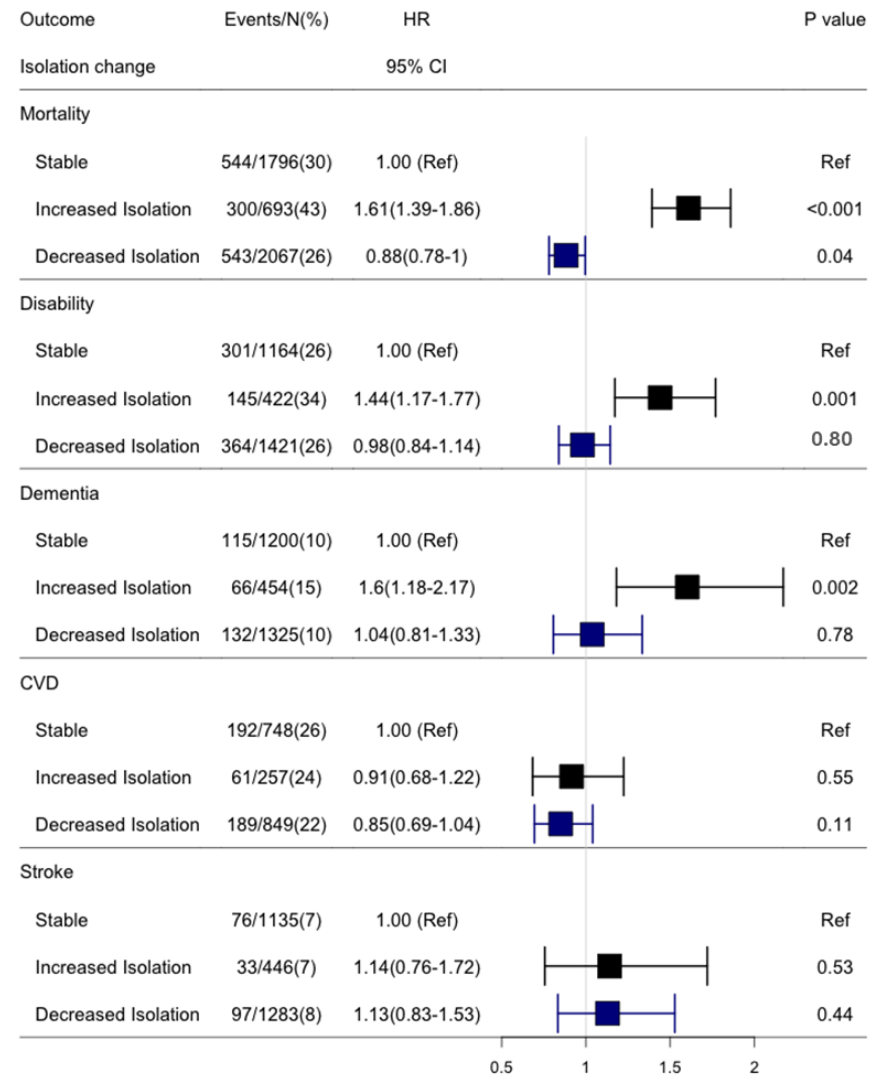

**Efigure 5: Sensitivity analysis 1: adjusted hazard ratios of changes in binary isolation group on distal outcomes stratified by the social isolation status**

The hazard ratios (95% confident interval) between binary isolation change group are estimated for each outcome with stable social isolation as the reference group with covariate adjustment and IPTW use. The p-value column presents the p-values testing the corresponding HR of diabetes to the null hypothesis (HR=1).

### A) Baseline Not Isolated

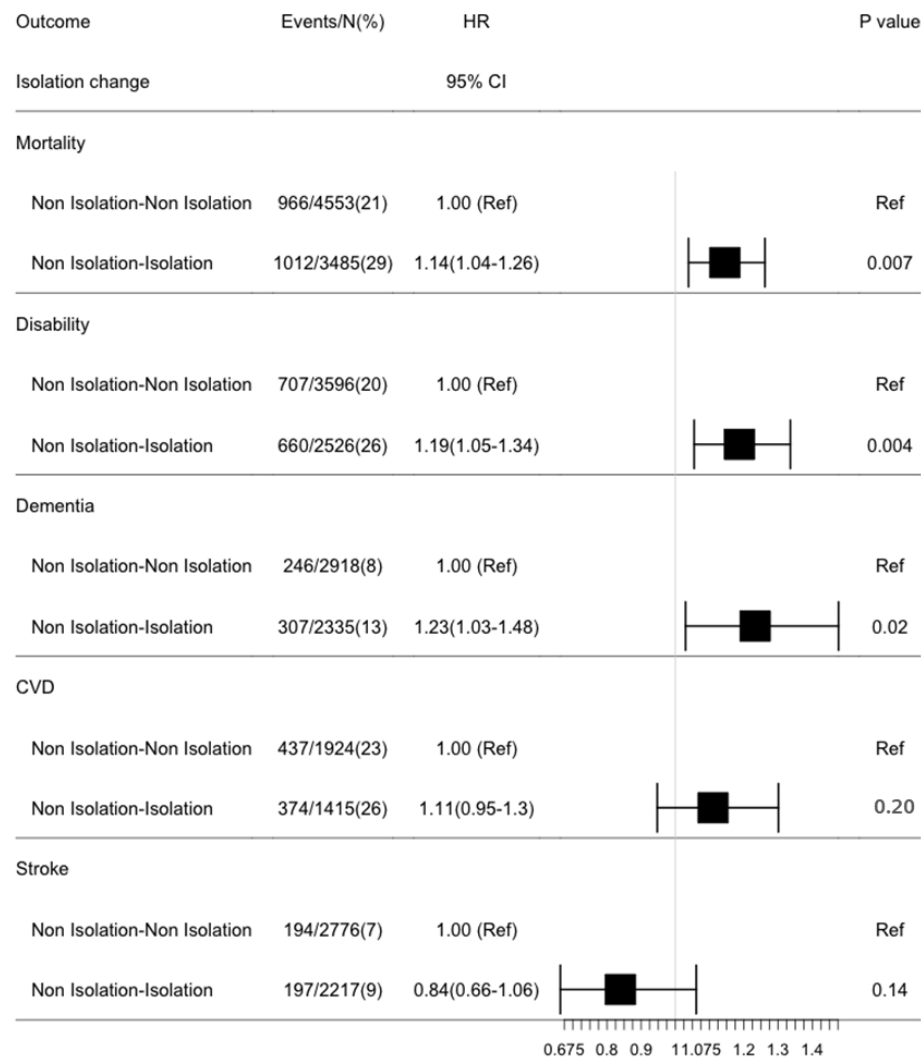

### B) Baseline Isolated

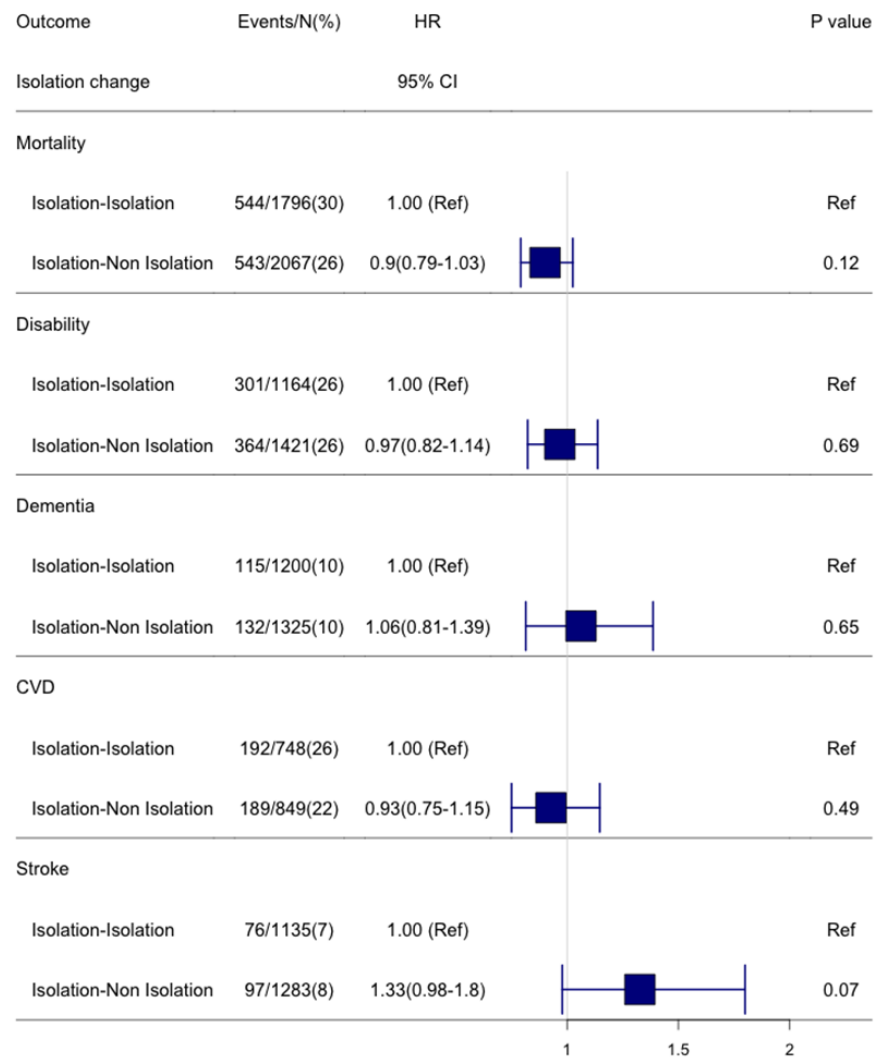

**Efigure 6: Sensitivity analysis 2: Adjusted hazard ratios of changes in isolation group on distal outcomes among individuals who did not die within 2 years post second SII measurement**

The hazard ratios (95% confident interval) between isolation change group are estimated for each outcome with stable social isolation as the reference group with covariate adjustment and IPTW use. The p-value column presents the p-values testing the corresponding HR of diabetes to the null hypothesis (HR=1).

### A) Baseline Not Isolated

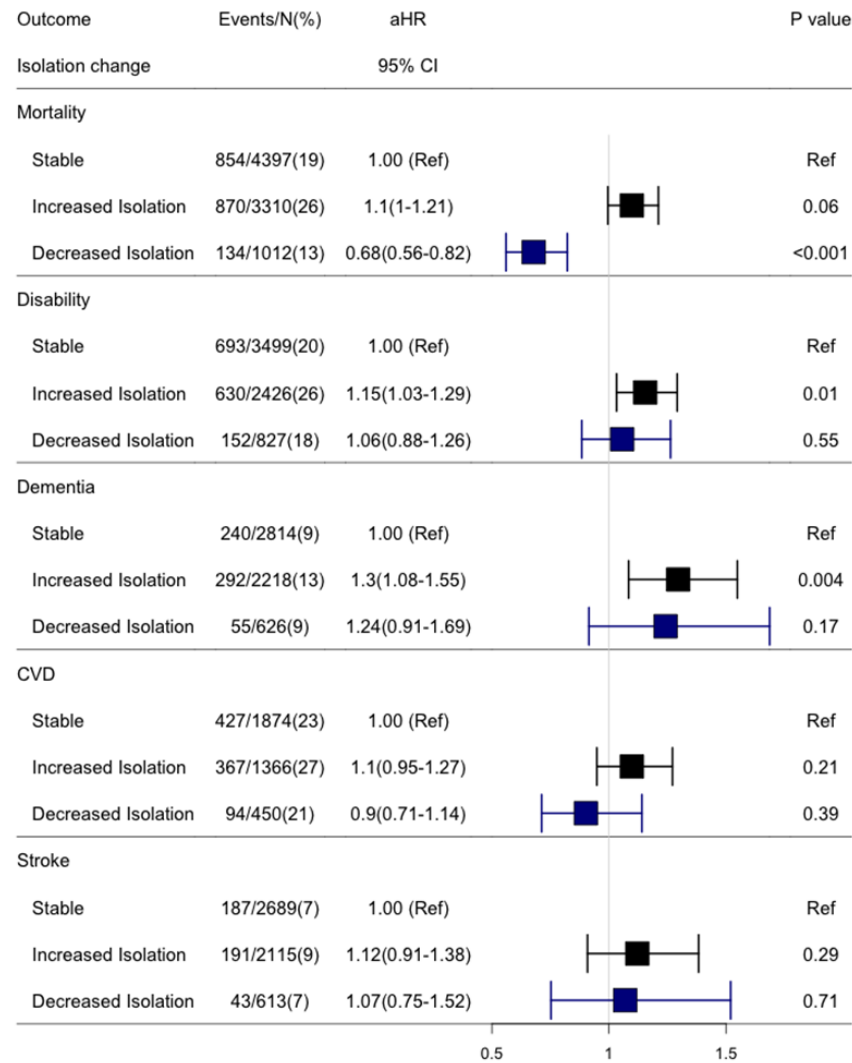

### B) Baseline Isolated

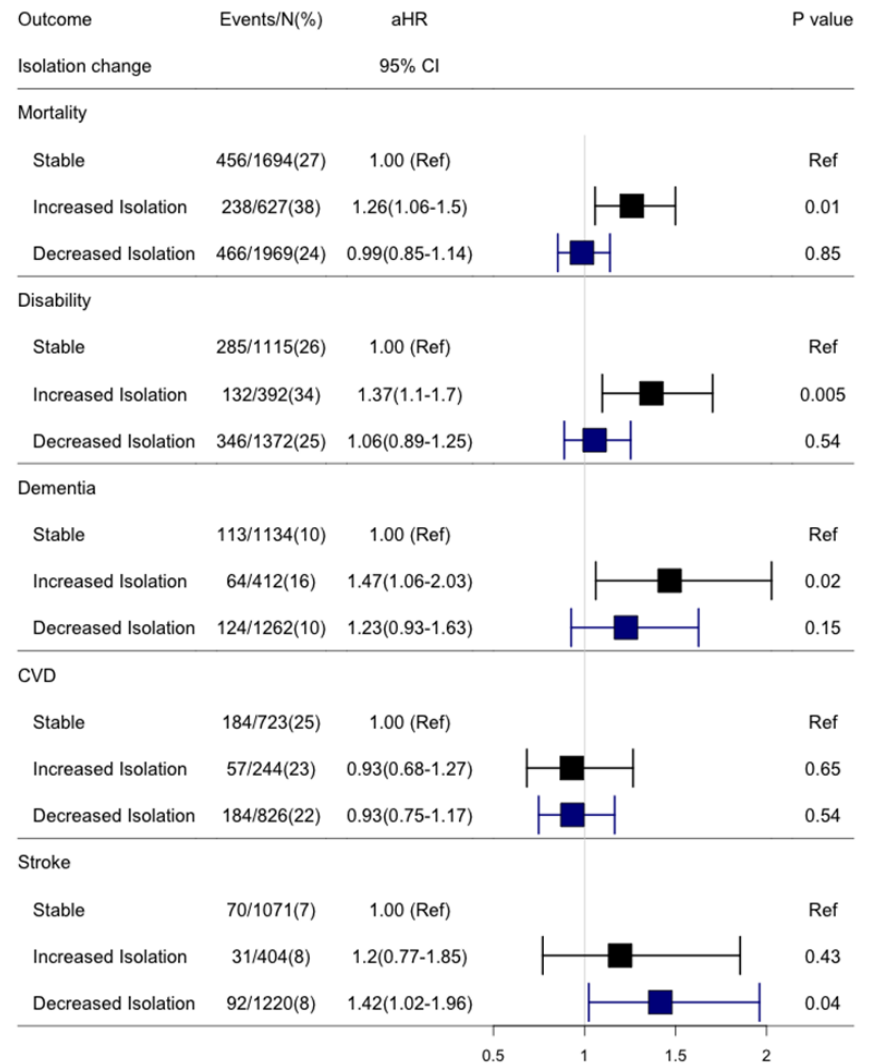

**Efigure 7: Sensitivity analysis 3: Adjusted hazard ratios of changes in isolation group on distal outcomes stratified by the social isolation status incorporating HRS sampling weights**

The hazard ratios (95% confident interval) between isolation change group are estimated for each outcome with stable social isolation as the reference group with covariate adjustment, IPTW use and HRS sampling weights. The p-value column presents the p-values testing the corresponding HR of diabetes to the null hypothesis (HR=1).



### A) Baseline Not Isolated

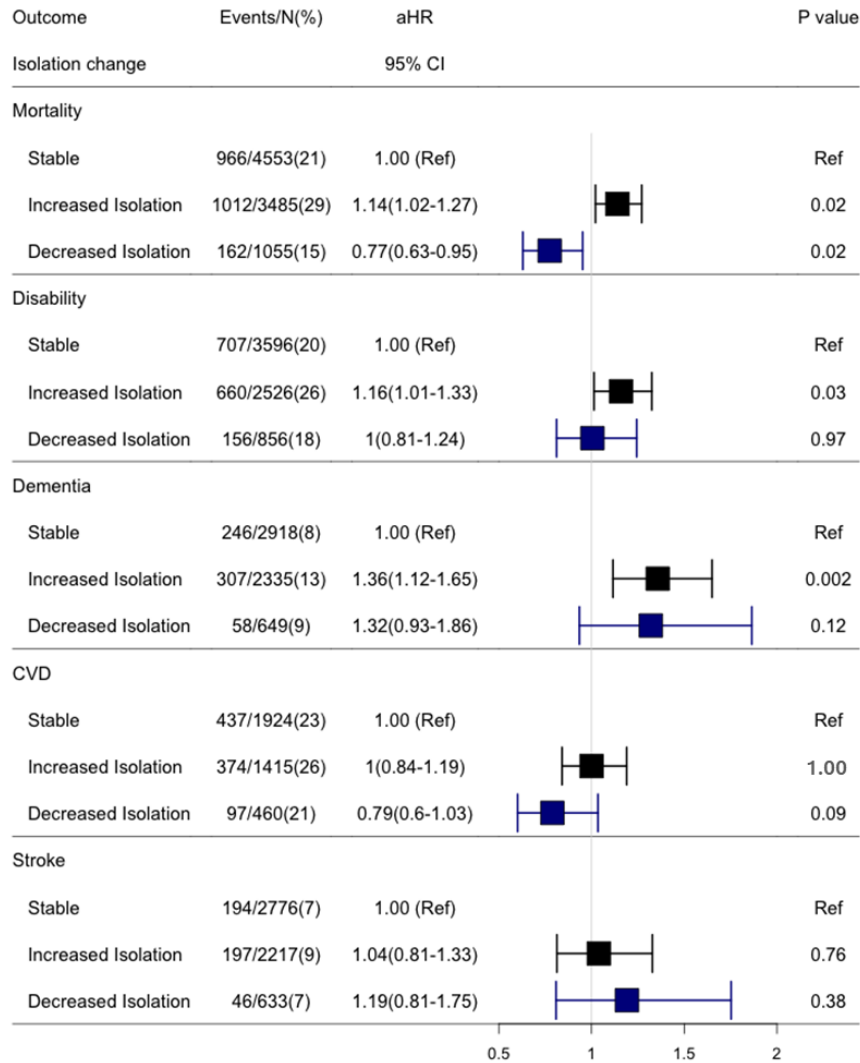

### B) Baseline Isolated

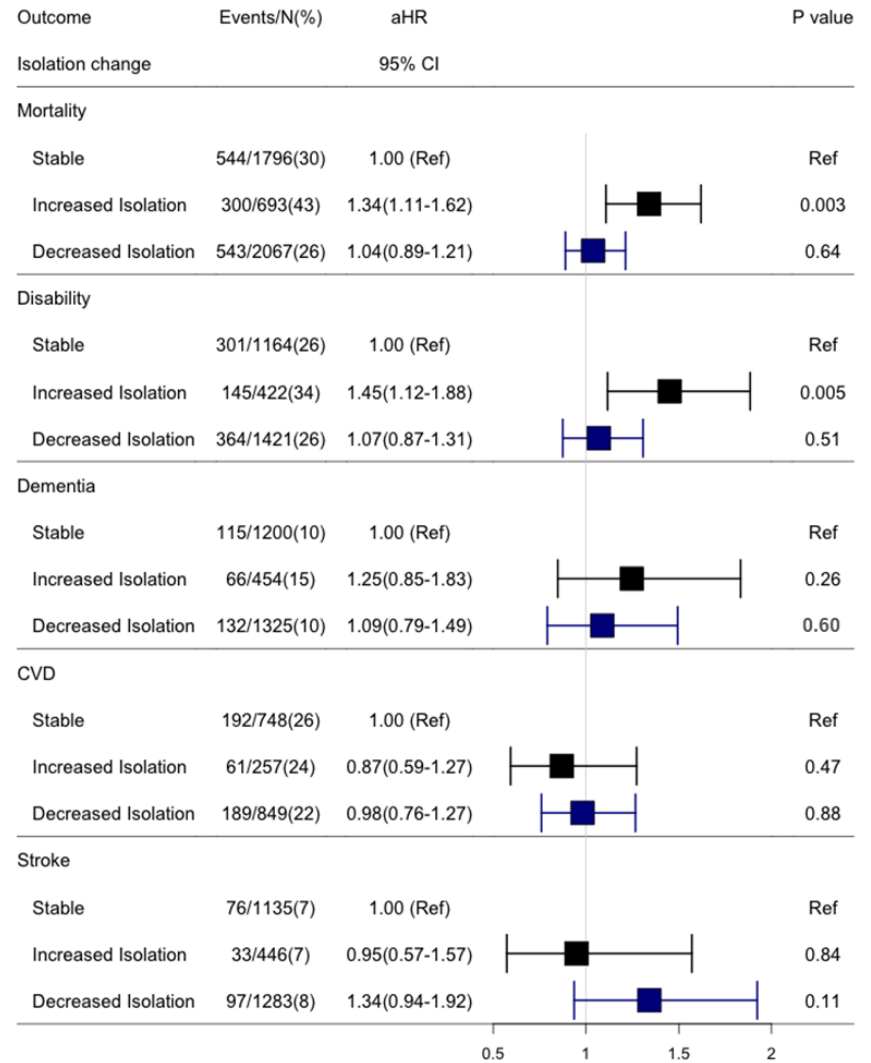

**Etable 1: ICD-10 Diagnosis codes from Medicare Chronic Conditions Warehouse.**

| Outcome                     | ICD-10 Codes                                                                                                                                                                                                                                                                                                                                                                                                                                                                                                                                                                                                                                                                                                                                                                                                                                                                                                                                                                                                                                                                                                                                                                     |
|-----------------------------|----------------------------------------------------------------------------------------------------------------------------------------------------------------------------------------------------------------------------------------------------------------------------------------------------------------------------------------------------------------------------------------------------------------------------------------------------------------------------------------------------------------------------------------------------------------------------------------------------------------------------------------------------------------------------------------------------------------------------------------------------------------------------------------------------------------------------------------------------------------------------------------------------------------------------------------------------------------------------------------------------------------------------------------------------------------------------------------------------------------------------------------------------------------------------------|
| Atrial fibrillation         | I48.0, I48.1, I48.11, I48.19, I48.2, I48.20, I48.21, I48.3, I48.4, I48.91                                                                                                                                                                                                                                                                                                                                                                                                                                                                                                                                                                                                                                                                                                                                                                                                                                                                                                                                                                                                                                                                                                        |
| Congestive heart failure    | I09.81, I11.0, I13.0, I13.2, I42.0, I42.5, I42.6, I42.7, I42.8, I43, I50.1, I50.20, I50.21, I50.22, I50.23, I50.30, I50.31, I50.32, I50.33, I50.40, I50.41, I50.42, I50.43, I50.810, I50.811, I50.812, I50.813, I50.814, I50.82, I50.83, I50.84, I50.89, I50.9, P29.0                                                                                                                                                                                                                                                                                                                                                                                                                                                                                                                                                                                                                                                                                                                                                                                                                                                                                                            |
| Ischemic heart disease      | I20.0, I20.1, I20.8, I24.0, I24.1, I24.8, I25.10, I25.110, I25.111, I25.118, I25.119, I25.3, I25.41, I25.42, I25.5, I25.6, I25.700, I25.701, I25.708, I25.710, I25.711, I25.718, I25.719, I25.720, I25.721, I25.728, I25.729, I25.730, I25.731, I25.738, I25.739, I25.750, I25.751, I25.758, I25.759, I25.760, I25.761, I25.768, I25.769, I25.790, I25.791, I25.798, I25.799, I25.810, I25.811, I25.812, I25.82, I25.83, I25.84, I25.89, I25.9                                                                                                                                                                                                                                                                                                                                                                                                                                                                                                                                                                                                                                                                                                                                   |
| Acute myocardial infarction | I21.01, I21.02, I21.09, I21.11, I21.19, I21.21, I21.29, I21.3, I21.4, I21.9, I21.A1, I21.A9, I22.0, I22.1, I22.2, I22.8, I22.9                                                                                                                                                                                                                                                                                                                                                                                                                                                                                                                                                                                                                                                                                                                                                                                                                                                                                                                                                                                                                                                   |
| Stroke*                     | G45.0, G45.1, G45.2, G45.3, G45.8, G45.9, G46.0, G46.1, G46.2, G46.3, G46.4, G46.5, G46.6, G46.7, G46.8, G97.31, G97.32, I60.00, I60.01, I60.02, I60.10, I60.11, I60.12, I60.2, I60.20, I60.21, I60.22, I60.30, I60.31, I60.32, I60.4, I60.50, I60.51, I60.52, I60.6, I60.7, I60.8, I60.9, I61.0, I61.1, I61.2, I61.3, I61.4, I61.5, I61.6, I61.8, I61.9, I62.00, I62.01, I62.02, I62.9, I63.00, I63.011, I63.012, I63.013, I63.019, I63.02, I63.031, I63.032, I63.033, I63.039, I63.09, I63.10, I63.111, I63.112, I63.113, I63.119, I63.12, I63.131, I63.132, I63.133, I63.139, I63.19, I63.20, I63.211, I63.212, I63.213, I63.219, I63.22, I63.231, I63.232, I63.233, I63.239, I63.29, I63.30, I63.311, I63.312, I63.313, I63.319, I63.321, I63.322, I63.323, I63.329, I63.331, I63.332, I63.333, I63.339, I63.341, I63.342, I63.343, I63.349, I63.39, I63.40, I63.411, I63.412, I63.413, I63.419, I63.421, I63.422, I63.423, I63.429, I63.431, I63.432, I63.433, I63.439, I63.441, I63.442, I63.443, I63.449, I63.49, I63.50, I63.511, I63.512, I63.513, I63.519, I63.521, I63.522, I63.523, I63.529, I63.531, I63.532, I63.533, I63.539, I63.541, I63.542, I63.543, I63.549, |

|                                                              |                                                                                                                                                           |
|--------------------------------------------------------------|-----------------------------------------------------------------------------------------------------------------------------------------------------------|
|                                                              | I63.59, I63.6, I63.8, I63.81, I63.89, I63.9, I67.841, I67.848, I67.89, I97.810, I97.811, I97.820, I97.821                                                 |
| Alzheimer's Disease                                          | G30.0, G30.1, G30.8, G30.9                                                                                                                                |
| Alzheimer's Disease and Related Disorders or Senile Dementia | F01.50, F01.51, F02.80, F02.81, F03.90, F03.91, F04, F05, F06.1, F06.8, G13.8, G30.0, G30.1, G30.8, G30.9, G31.01, G31.09, G31.1, G31.2, G94, R41.81, R54 |

\* If any of the qualifying claims have any of the following codes in any DX position then Stroke diagnosis was excluded: S06.340A, S06.341A, S06.350A, S06.351A, S06.360A, S06.361A, S06.370A, S06.371A, S06.380A, S06.381A, S06.5X0A, S06.5X1A, S06.6X0A, S06.6X1A, S06.810A, S06.811A, S06.820A, S06.821A, S06.890A, S06.891A, S06.9X0A, S06.9X1A, S06.A0XA, S06.A1XA, S06.342A, S06.343A, S06.344A, S06.345A, S06.346A, S06.347A, S06.348A, S06.349A, S06.352A, S06.353A, S06.354A, S06.355A, S06.356A, S06.357A, S06.358A, S06.359A, S06.362A, S06.363A, S06.364A, S06.365A, S06.366A, S06.367A, S06.368A, S06.369A, S06.372A, S06.373A, S06.374A, S06.375A, S06.376A, S06.377A, S06.378A, S06.379A, S06.382A, S06.383A, S06.384A, S06.385A, S06.386A, S06.387A, S06.388A, S06.389A, S06.5X2A, S06.5X3A, S06.5X4A, S06.5X5A, S06.5X6A, S06.5X7A, S06.5X8A, S06.5X9A, S06.6X2A, S06.6X3A, S06.6X4A, S06.6X5A, S06.6X6A, S06.6X7A, S06.6X8A, S06.6X9A, S06.812A, S06.813A, S06.814A, S06.815A, S06.816A, S06.817A, S06.818A, S06.819A, S06.822A, S06.823A, S06.824A, S06.825A, S06.826A, S06.827A, S06.828A, S06.829A, S06.892A, S06.893A, S06.894A, S06.895A, S06.896A, S06.897A, S06.898A, S06.899A, S06.9X2A, S06.9X3A, S06.9X4A, S06.9X5A, S06.9X6A, S06.9X7A, S06.9X8A, S06.9X9A

**Etable 2: Social Isolation Index change from baseline to second social isolation measurement stratified by isolation status**

|                                | Baseline Non-isolation | Baseline Isolation |
|--------------------------------|------------------------|--------------------|
| Decreased isolation, mean (SD) | -1.00 (0)              | -1.37 (0.63)       |
| Stable, mean (SD)              | 0 (0)                  | 0 (0)              |
| Increased isolation, mean (SD) | 1.30 (0.62)            | 1.41 (0.60)        |

**Etable 3: Demographic and clinical characteristics of the HRS analysis cohort by social isolation group from baseline to second social isolation measure.**

A) Demographic characteristics of the HRS analysis cohort with **baseline not isolated** and by social isolation group from baseline to second social isolation measure

|                                       | <b>Decreased Isolation, No. (%)</b> | <b>Stable, No. (%)</b> | <b>Increased Isolation, No. (%)</b> | <b>P value<sup>a</sup></b> |
|---------------------------------------|-------------------------------------|------------------------|-------------------------------------|----------------------------|
| <b>Patients, No.</b>                  | 1055                                | 4553                   | 3485                                |                            |
| <b>Sex</b>                            |                                     |                        |                                     | <b>&lt;0.001</b>           |
| <b>Male</b>                           | 513 (48.6)                          | 1906 (41.9)            | 1374 (39.4)                         |                            |
| <b>Female</b>                         | 542 (51.4)                          | 2647 (58.1)            | 2111 (60.6)                         |                            |
| <b>Cohort<sup>b</sup></b>             |                                     |                        |                                     | <b>&lt;0.001</b>           |
| <b>AHEAD</b>                          | 16 (1.5)                            | 135 (3.0)              | 174 (5.0)                           |                            |
| <b>CODA</b>                           | 81 (7.7)                            | 404 (8.9)              | 452 (13.0)                          |                            |
| <b>HRS</b>                            | 344 (32.6)                          | 1566 (34.4)            | 1221 (35.0)                         |                            |
| <b>WB</b>                             | 185 (17.5)                          | 771 (16.9)             | 497 (14.3)                          |                            |
| <b>BB</b>                             | 429 (40.7)                          | 1677 (36.8)            | 1141 (32.7)                         |                            |
| <b>Race and ethnicity<sup>c</sup></b> |                                     |                        |                                     | <b>&lt;0.001</b>           |
| <b>Hispanic</b>                       | 93 (8.8)                            | 365 (8.0)              | 345 (9.9)                           |                            |
| <b>Non-Hispanic Black</b>             | 121 (11.5)                          | 598 (13.1)             | 535 (15.4)                          |                            |
| <b>Non-Hispanic White</b>             | 811 (76.9)                          | 3482 (76.5)            | 2517 (72.2)                         |                            |
| <b>Other</b>                          | 30 (2.8)                            | 108 (2.4)              | 88 (2.5)                            |                            |
| <b>Educational Level, y</b>           |                                     |                        |                                     | <b>&lt;0.001</b>           |
| <b>&lt;12</b>                         | 122 (11.6)                          | 640 (14.1)             | 650 (18.7)                          |                            |
| <b>12</b>                             | 329 (31.2)                          | 1496 (32.9)            | 1185 (34.0)                         |                            |

|                                   |              |              |              |                  |
|-----------------------------------|--------------|--------------|--------------|------------------|
| >12                               | 604 (57.3)   | 2417 (53.1)  | 1650 (47.3)  |                  |
| <b>Baseline characteristics</b>   |              |              |              |                  |
| <b>Age, mean (SD), y</b>          | 63.54 (8.67) | 64.65 (9.09) | 66.30 (9.77) | <b>&lt;0.001</b> |
| <b>Proxy vs Self</b>              | 1043 (98.9)  | 4499 (98.8)  | 3446 (98.9)  | 0.96             |
| <b>Baseline Year</b>              |              |              |              | 0.21             |
| <b>2006</b>                       | 449 (42.6)   | 1839 (40.4)  | 1447 (41.5)  |                  |
| <b>2008</b>                       | 337 (31.9)   | 1586 (34.8)  | 1225 (35.2)  |                  |
| <b>2010</b>                       | 138 (13.1)   | 561 (12.3)   | 383 (11.0)   |                  |
| <b>2012</b>                       | 107 (10.1)   | 466 (10.2)   | 336 (9.6)    |                  |
| <b>2014</b>                       | 24 (2.3)     | 101 (2.2)    | 94 (2.7)     |                  |
| <b>BMI, mean (SD)<sup>d</sup></b> | 28.36 (5.55) | 28.54 (5.75) | 28.57 (5.70) | 0.56             |
| <b>Hypertension</b>               | 484 (45.9)   | 2327 (51.1)  | 1892 (54.3)  | <b>&lt;0.001</b> |
| <b>Diabetes</b>                   | 156 (14.8)   | 755 (16.6)   | 637 (18.3)   | <b>0.02</b>      |
| <b>Lung Disease</b>               | 52 (4.9)     | 257 (5.6)    | 254 (7.3)    | <b>0.002</b>     |
| <b>Heart Disease</b>              | 181 (17.2)   | 785 (17.2)   | 707 (20.3)   | <b>0.001</b>     |
| <b>Stroke</b>                     | 54 (5.1)     | 210 (4.6)    | 195 (5.6)    | 0.14             |
| <b>Cancer</b>                     | 120 (11.4)   | 554 (12.2)   | 466 (13.4)   | 0.15             |
| <b>Psychiatric problems</b>       | 103 (9.8)    | 498 (10.9)   | 462 (13.3)   | 0.13             |
| <b>Arthritis</b>                  | 499 (47.3)   | 2397 (52.6)  | 1964 (56.4)  | <b>0.001</b>     |
| <b>Total Assets, quantile</b>     |              |              |              | <b>&lt;0.001</b> |
| <b>1<sup>st</sup></b>             | 129 (12.2)   | 543 (11.9)   | 533 (15.3)   |                  |
| <b>2<sup>nd</sup></b>             | 159 (15.1)   | 779 (17.1)   | 737 (21.1)   |                  |
| <b>3<sup>rd</sup></b>             | 260 (24.6)   | 1181 (25.9)  | 959 (27.5)   |                  |
| <b>4<sup>th</sup></b>             | 507 (48.1)   | 2050 (45.0)  | 1256 (36.0)  |                  |
| <b>CES-D score, mean (SD)</b>     | 0.91 (1.51)  | 1.01 (1.60)  | 1.28 (1.84)  | <b>&lt;0.001</b> |
| <b>Current Smoker</b>             | 101 (9.6)    | 508 (11.2)   | 437 (12.5)   | <b>0.02</b>      |
| <b>Married vs not married</b>     | 100 (9.5)    | 735 (16.1)   | 820 (23.5)   | <b>&lt;0.001</b> |

|                                                                           |              |              |              |                  |
|---------------------------------------------------------------------------|--------------|--------------|--------------|------------------|
| <b>ADL score, mean (SD)<sup>e</sup></b>                                   | 0.15 (0.58)  | 0.16 (0.59)  | 0.24 (0.77)  | <b>&lt;0.001</b> |
| <b>Cognition, mean (SD)</b>                                               | 16.61 (3.74) | 16.32 (3.80) | 15.58 (3.98) | <b>&lt;0.001</b> |
| <b>Incidence Disease from Baseline to Second Social Isolation Measure</b> |              |              |              |                  |
| <b>Hypertension</b>                                                       | 86 (8.2)     | 357 (7.8)    | 274 (7.9)    | 0.94             |
| <b>Diabetes</b>                                                           | 73 (6.9)     | 259 (5.7)    | 188 (5.4)    | 0.17             |
| <b>Lung Disease</b>                                                       | 23 (2.2)     | 111 (2.4)    | 104 (3.0)    | 0.20             |
| <b>Heart Disease</b>                                                      | 63 (6.0)     | 282 (6.2)    | 243 (7.0)    | 0.29             |
| <b>Stroke</b>                                                             | 25 (2.4)     | 102 (2.2)    | 137 (3.9)    | <b>&lt;0.001</b> |
| <b>Cancer</b>                                                             | 40 (3.8)     | 183 (4.0)    | 151 (4.3)    | 0.67             |
| <b>Psychiatric Problem</b>                                                | 25 (2.4)     | 128 (2.8)    | 133 (3.8)    | <b>0.01</b>      |
| <b>Arthritis</b>                                                          | 85 (8.1)     | 332 (7.3)    | 277 (7.9)    | 0.47             |
| <b>Change from Baseline to Second Social Isolation Measure, mean (SD)</b> |              |              |              |                  |
| <b>CES-D score</b>                                                        | -0.02 (1.37) | 0.02 (1.40)  | 0.09 (1.57)  | <b>0.03</b>      |
| <b>ADL score<sup>e</sup></b>                                              | 0.01 (0.55)  | 0.04 (0.57)  | 0.10 (0.72)  | <b>&lt;0.001</b> |
| <b>Cognition</b>                                                          | -0.36 (2.98) | -0.37 (2.91) | -0.54 (3.07) | <b>0.03</b>      |
| <b>Follow up years for each outcome, median (range)</b>                   |              |              |              |                  |
| <b>Mortality</b>                                                          | 8 (0.5-10)   | 8 (0.1-10)   | 8 (0.3-10)   |                  |
| <b>Disability</b>                                                         | 8 (0-10)     | 8 (0-10)     | 8 (0-10)     |                  |
| <b>Dementia</b>                                                           | 7 (0.1-7)    | 7 (0-7)      | 7 (0-7)      |                  |
| <b>CVD</b>                                                                | 7 (0.1-7)    | 7 (0-7)      | 7 (0-7)      |                  |
| <b>Stroke</b>                                                             | 7 (0.1-7)    | 7 (0.1-7)    | 7 (0.1-7)    |                  |

B) Demographic characteristics of the HRS analysis cohort with baseline isolated and by social isolation group from baseline to second social isolation measure

|                                       | Decreased Isolation, No. (%) | Stable, No. (%) | Increased Isolation, No. (%) | P value <sup>a</sup> |
|---------------------------------------|------------------------------|-----------------|------------------------------|----------------------|
| <b>Patients, No.</b>                  | 2067                         | 1796            | 693                          |                      |
| <b>Sex</b>                            |                              |                 |                              | <b>&lt;0.001</b>     |
| <b>Male</b>                           | 919 (44.5)                   | 631 (35.1)      | 295 (42.6)                   |                      |
| <b>Female</b>                         | 1148 (55.5)                  | 1165 (64.9)     | 398 (57.4)                   |                      |
| <b>Cohort<sup>b</sup></b>             |                              |                 |                              | <b>&lt;0.001</b>     |
| <b>AHEAD</b>                          | 82 (4.0)                     | 101 (5.6)       | 67 (9.7)                     |                      |
| <b>CODA</b>                           | 183 (8.9)                    | 193 (10.7)      | 101 (14.6)                   |                      |
| <b>HRS</b>                            | 679 (32.8)                   | 612 (34.1)      | 215 (31.0)                   |                      |
| <b>WB</b>                             | 289 (14.0)                   | 236 (13.1)      | 81 (11.7)                    |                      |
| <b>BB</b>                             | 834 (40.3)                   | 654 (36.4)      | 229 (33.0)                   |                      |
| <b>Race and ethnicity<sup>c</sup></b> |                              |                 |                              | 0.07                 |
| <b>Hispanic</b>                       | 256 (12.4)                   | 194 (10.8)      | 79 (11.4)                    |                      |
| <b>Non-Hispanic Black</b>             | 405 (19.6)                   | 305 (17.0)      | 110 (15.9)                   |                      |
| <b>Non-Hispanic White</b>             | 1342 (64.9)                  | 1245 (69.3)     | 486 (70.1)                   |                      |
| <b>Other</b>                          | 64 (3.1)                     | 52 (2.9)        | 18 (2.6)                     |                      |
| <b>Educational level</b>              |                              |                 |                              | <b>0.003</b>         |
| <b>&lt;12</b>                         | 477 (23.1)                   | 452 (25.2)      | 203 (29.3)                   |                      |
| <b>12</b>                             | 697 (33.7)                   | 635 (35.4)      | 238 (34.3)                   |                      |
| <b>&gt;12</b>                         | 893 (43.2)                   | 709 (39.5)      | 252 (36.4)                   |                      |
| <b>Baseline characteristics</b>       |                              |                 |                              |                      |
| <b>Age, mean (SD)</b>                 | 64.80 (9.53)                 | 65.85 (9.84)    | 67.88 (10.80)                | <b>&lt;0.001</b>     |
| <b>Proxy vs self</b>                  | 2043 (98.8)                  | 1767 (98.4)     | 683 (98.6)                   | 0.48                 |



|                                                                           |              |              |              |        |
|---------------------------------------------------------------------------|--------------|--------------|--------------|--------|
| <b>Baseline Year</b>                                                      |              |              |              | 0.27   |
| <b>2006</b>                                                               | 787 (38.1)   | 659 (36.7)   | 260 (37.5)   |        |
| <b>2008</b>                                                               | 695 (33.6)   | 673 (37.5)   | 264 (38.1)   |        |
| <b>2010</b>                                                               | 294 (14.2)   | 235 (13.1)   | 87 (12.6)    |        |
| <b>2012</b>                                                               | 234 (11.3)   | 189 (10.5)   | 67 (9.7)     |        |
| <b>2014</b>                                                               | 57 (2.8)     | 40 (2.2)     | 15 (2.2)     |        |
| <b>BMI, mean (SD)<sup>d</sup></b>                                         | 29.00 (6.08) | 28.99 (6.63) | 28.43 (6.51) | 0.10   |
| <b>Hypertension</b>                                                       | 1139 (55.1)  | 1018 (56.7)  | 398 (57.4)   | 0.46   |
| <b>Diabetes</b>                                                           | 431 (20.9)   | 365 (20.3)   | 148 (21.4)   | 0.83   |
| <b>Lung disease</b>                                                       | 188 (9.1)    | 181 (10.1)   | 71 (10.2)    | 0.50   |
| <b>Heart disease</b>                                                      | 394 (19.1)   | 370 (20.6)   | 167 (24.1)   | 0.02   |
| <b>Stroke</b>                                                             | 132 (6.4)    | 129 (7.2)    | 67 (9.7)     | 0.02   |
| <b>Cancer</b>                                                             | 258 (12.5)   | 205 (11.4)   | 77 (11.1)    | 0.48   |
| <b>Psychiatric problems</b>                                               | 363 (17.6)   | 327 (18.2)   | 148 (21.4)   | 0.08   |
| <b>Arthritis</b>                                                          | 1110 (53.7)  | 1056 (58.8)  | 385 (55.6)   | 0.006  |
| <b>Total assets, quantile</b>                                             |              |              |              | 0.001  |
| <b>1<sup>st</sup></b>                                                     | 584 (28.3)   | 549 (30.6)   | 242 (34.9)   |        |
| <b>2<sup>nd</sup></b>                                                     | 478 (23.1)   | 456 (25.4)   | 173 (25.0)   |        |
| <b>3<sup>rd</sup></b>                                                     | 473 (22.9)   | 396 (22.0)   | 142 (20.5)   |        |
| <b>4<sup>th</sup></b>                                                     | 532 (25.7)   | 395 (22.0)   | 136 (19.6)   |        |
| <b>CES-D score, mean (SD)</b>                                             | 1.71 (2.16)  | 1.85 (2.25)  | 2.18 (2.35)  | <0.001 |
| <b>Current Smoker</b>                                                     | 336 (16.3)   | 343 (19.1)   | 145 (20.9)   | 0.008  |
| <b>Married vs not married</b>                                             | 949 (45.9)   | 1182 (65.8)  | 449 (64.8)   | <0.001 |
| <b>ADL score, mean (SD)<sup>e</sup></b>                                   | 0.34 (0.94)  | 0.39 (1.00)  | 0.51 (1.13)  | <0.001 |
| <b>Cognition, mean (SD)</b>                                               | 15.08 (4.17) | 15.27 (4.09) | 14.14 (4.41) | <0.001 |
| <b>Incidence Disease from Baseline to Second Social Isolation Measure</b> |              |              |              |        |
| <b>Hypertension</b>                                                       | 177 (8.6)    | 149 (8.3)    | 65 (9.4)     | 0.69   |
| <b>Diabetes</b>                                                           | 104 (5.0)    | 104 (5.8)    | 34 (4.9)     | 0.50   |

|                                                                           |              |              |              |                  |
|---------------------------------------------------------------------------|--------------|--------------|--------------|------------------|
| <b>Lung disease</b>                                                       | 70 (3.4)     | 88 (4.9)     | 34 (4.9)     | <b>0.04</b>      |
| <b>Heart disease</b>                                                      | 128 (6.2)    | 127 (7.1)    | 50 (7.2)     | 0.46             |
| <b>Stroke</b>                                                             | 61 (3.0)     | 51 (2.8)     | 30 (4.3)     | 0.13             |
| <b>Cancer</b>                                                             | 90 (4.4)     | 67 (3.7)     | 28 (4.0)     | 0.62             |
| <b>Psychiatric problem</b>                                                | 67 (3.2)     | 59 (3.3)     | 45 (6.5)     | <b>&lt;0.001</b> |
| <b>Arthritis</b>                                                          | 163 (7.9)    | 139 (7.7)    | 57 (8.2)     | 0.92             |
| <b>Change from Baseline to Second Social Isolation Measure, mean (SD)</b> |              |              |              |                  |
| <b>CESD score</b>                                                         | -0.13 (1.74) | -0.10 (1.68) | -0.06 (1.97) | 0.60             |
| <b>ADL score<sup>e</sup></b>                                              | 0.07 (0.78)  | 0.10 (0.83)  | 0.26 (1.05)  | <b>&lt;0.001</b> |
| <b>Cognition</b>                                                          | -0.47 (3.14) | -0.58 (3.06) | -0.79 (3.21) | 0.06             |
| <b>Follow up years for each outcome, median (range)</b>                   |              |              |              |                  |
| <b>Mortality</b>                                                          | 8 (0.5-10)   | 8 (0.4-10)   | 8 (0.3-10)   |                  |
| <b>Disability</b>                                                         | 8 (0-10)     | 8 (0-10)     | 8 (0-10)     |                  |
| <b>Dementia</b>                                                           | 7 (0-7)      | 7 (0.2-7)    | 7 (0-7)      |                  |
| <b>CVD</b>                                                                | 7 (0-7)      | 7 (0-7)      | 7 (0.1-7)    |                  |
| <b>Stroke</b>                                                             | 7 (0-7)      | 7 (0.1-7)    | 7 (0-7)      |                  |

a. P-values are from the two-sample t-test or Wilcoxon rank sum test for comparing continuous covariates and the chi-square test for comparing categorical covariates; p value <0.05 was considered as significant and marked in red color.

b. Other race includes American Indian, Alaskan Native, Asian, Native Hawaiian, and Pacific Islander, other race or unknown.

c. HRS included six birth cohorts: the Study of Assets and Health Dynamics Among the Oldest Old (AHEAD) cohort, born prior to 1924; the Children of the Depression (CODA) cohort, born 1924 to 1930; the original HRS cohort, born 1931 to 1941; the War Baby (WB) cohort, born 1942 to 1947; the Baby Boomer (BB) cohort, born 1948 to 1959.

d. BMI: body mass index

e. ADL: activities of daily living

f. Model-adjusted 27-point cognition score

**Etable 4: The hazard ratios of full covariates on distal outcomes stratified by the social isolation status**

A) The hazard ratios of full covariates on mortality stratified by the social isolation status

|                                                                                     | Baseline Non-isolation |         | Baseline Isolation |         |
|-------------------------------------------------------------------------------------|------------------------|---------|--------------------|---------|
|                                                                                     | aHR (95% CI)           | P value | aHR (95% CI)       | P value |
| Baseline isolation (ref: baseline non-isolation)                                    | 0.98 (0.84, 1.14)      | 0.75    | 1.03 (0.88, 1.19)  | 0.75    |
| Increased isolation (ref: stable)                                                   | 1.10 (1.01, 1.21)      | 0.04    | 1.29 (1.09, 1.51)  | 0.002   |
| Decreased isolation (ref: stable)                                                   | 0.73 (0.61, 0.87)      | <0.001  | 0.98 (0.86, 1.12)  | 0.78    |
| Sex = female (ref: male)                                                            | 0.75 (0.70, 0.82)      | <0.001  | 0.75 (0.70, 0.82)  | <0.001  |
| Cohort = CODA (ref: AHEAD)                                                          | 1.14 (0.98, 1.34)      | 0.09    | 1.14 (0.98, 1.34)  | 0.09    |
| Cohort = HRS (ref: AHEAD)                                                           | 1.33 (1.06, 1.67)      | 0.01    | 1.33 (1.06, 1.67)  | 0.01    |
| Cohort = WB (ref: AHEAD)                                                            | 1.56 (1.12, 2.19)      | 0.01    | 1.56 (1.12, 2.19)  | 0.009   |
| Cohort = BB (ref: AHEAD)                                                            | 2.16 (1.43, 3.27)      | <0.001  | 2.16 (1.43, 3.27)  | <0.001  |
| Race and ethnicity = Non-Hispanic Black (ref: Hispanic)                             | 1.33 (1.10, 1.60)      | 0.004   | 1.33 (1.10, 1.60)  | 0.004   |
| Race and ethnicity = Non-Hispanic White (ref: Hispanic)                             | 1.64 (1.39, 1.94)      | <0.001  | 1.64 (1.39, 1.94)  | <0.001  |
| Race and ethnicity = Other (ref: Hispanic)                                          | 1.14 (0.79, 1.63)      | 0.48    | 1.14 (0.79, 1.63)  | 0.48    |
| Educational level = 12 (ref: < 12)                                                  | 0.99 (0.90, 1.10)      | 0.89    | 0.99 (0.90, 1.10)  | 0.89    |
| Educational level > 12 (ref: < 12)                                                  | 1.00 (0.89, 1.11)      | 0.93    | 1.00 (0.89, 1.11)  | 0.93    |
| Age at baseline                                                                     | 1.12 (1.11, 1.13)      | <0.001  | 1.12 (1.11, 1.13)  | <0.001  |
| BMI at baseline                                                                     | 1.00 (1.00, 1.01)      | 0.35    | 1.00 (1.00, 1.011) | 0.35    |
| Hypertension at baseline                                                            | 1.15 (1.06, 1.25)      | 0.001   | 1.15 (1.06, 1.25)  | 0.001   |
| Diabetes at baseline                                                                | 1.34 (1.22, 1.46)      | <0.001  | 1.34 (1.22, 1.46)  | <0.001  |
| Lung disease at baseline                                                            | 1.63 (1.44, 1.85)      | <0.001  | 1.63 (1.44, 1.85)  | <0.001  |
| Heart disease at baseline                                                           | 1.42 (1.30, 1.54)      | <0.001  | 1.42 (1.30, 1.54)  | <0.001  |
| Stroke at baseline                                                                  | 1.34 (1.18, 1.53)      | <0.001  | 1.34 (1.18, 1.53)  | <0.001  |
| Cancer at baseline                                                                  | 1.48 (1.35, 1.62)      | <0.001  | 1.48 (1.35, 1.62)  | <0.001  |
| Psychiatric problems at baseline                                                    | 0.96 (0.85, 1.09)      | 0.57    | 0.96 (0.85, 1.09)  | 0.57    |
| Arthritis at baseline                                                               | 0.97 (0.90, 1.06)      | 0.53    | 0.97 (0.90, 1.06)  | 0.53    |
| CES-D score at baseline                                                             | 1.06 (1.03, 1.08)      | <0.001  | 1.06 (1.03, 1.08)  | <0.001  |
| Smoker at baseline                                                                  | 1.91 (1.71, 2.14)      | <0.001  | 1.91 (1.71, 2.14)  | <0.001  |
| Married vs not married at baseline =not married (ref: married)                      | 0.98 (0.89, 1.08)      | 0.66    | 0.98 (0.89, 1.08)  | 0.66    |
| ADL at baseline                                                                     | 1.03 (0.98, 1.09)      | 0.22    | 1.03 (0.98, 1.09)  | 0.22    |
| Total assets at baseline = 2 <sup>nd</sup> quantile (ref: 1 <sup>st</sup> quantile) | 1.00 (0.89, 1.13)      | 0.97    | 1.00 (0.89, 1.13)  | 0.97    |

|                                                                                     |                   |        |                   |        |
|-------------------------------------------------------------------------------------|-------------------|--------|-------------------|--------|
| Total assets at baseline = 3 <sup>rd</sup> quantile (ref: 1 <sup>st</sup> quantile) | 0.84 (0.74, 0.95) | 0.006  | 0.84 (0.74, 0.95) | 0.006  |
| Total assets at baseline = 4 <sup>th</sup> quantile (ref: 1 <sup>st</sup> quantile) | 0.80 (0.71, 0.91) | 0.001  | 0.80 (0.71, 0.91) | 0.001  |
| Cognition at baseline                                                               | 0.96 (0.95, 0.97) | <0.001 | 0.96 (0.95, 0.97) | <0.001 |
| Social isolation at baseline                                                        | 1.07 (0.99, 1.14) | 0.08   | 1.07 (0.99, 1.14) | 0.08   |
| Incident hypertension from baseline to second social isolation measure              | 1.02 (0.88, 1.17) | 0.82   | 1.02 (0.88, 1.17) | 0.82   |
| Incident diabetes from baseline to second social isolation measure                  | 1.04 (0.88, 1.22) | 0.64   | 1.04 (0.88, 1.22) | 0.64   |
| Incident lung disease from baseline to second social isolation measure              | 1.93 (1.66, 2.26) | <0.001 | 1.93 (1.66, 2.26) | <0.001 |
| Incident heart disease from baseline to second social isolation measure             | 1.37 (1.20, 1.56) | <0.001 | 1.37 (1.20, 1.56) | <0.001 |
| Incident stroke from baseline to second social isolation measure                    | 1.53 (1.29, 1.81) | <0.001 | 1.53 (1.29, 1.81) | <0.001 |
| Incident cancer from baseline to second social isolation measure                    | 1.78 (1.50, 2.10) | <0.001 | 1.78 (1.50, 2.10) | <0.001 |
| Incident psychiatric problems from baseline to second social isolation measure      | 1.06 (0.87, 1.29) | 0.56   | 1.06 (0.87, 1.29) | 0.56   |
| Incident arthritis from baseline to second social isolation measure                 | 0.94 (0.80, 1.09) | 0.40   | 0.94 (0.80, 1.09) | 0.40   |
| CES-D score change from baseline to second social isolation measure                 | 1.07 (1.04, 1.10) | <0.001 | 1.07 (1.04, 1.10) | <0.001 |
| Baseline isolation: increased isolation                                             | 1.16 (0.97, 1.40) | 0.11   | 0.86 (0.71, 1.03) | 0.11   |
| Baseline isolation: decreased isolation                                             | 1.35 (1.08, 1.67) | 0.008  | 0.74 (0.60, 0.93) | 0.008  |

B) The hazard ratios of full covariates on disability stratified by the social isolation status

|                                                                                     | Baseline Non-isolation |         | Baseline Isolation |         |
|-------------------------------------------------------------------------------------|------------------------|---------|--------------------|---------|
|                                                                                     | aHR (95% CI)           | P value | aHR (95% CI)       | P value |
| Baseline isolation (ref: baseline non-isolation)                                    | 1.02 (0.85, 1.23)      | 0.83    | 0.98 (0.81, 1.18)  | 0.83    |
| Increased isolation (ref: stable)                                                   | 1.15 (1.03, 1.28)      | 0.01    | 1.35 (1.09, 1.68)  | 0.006   |
| Decreased isolation (ref: stable)                                                   | 1.04 (0.88, 1.25)      | 0.63    | 1.05 (0.88, 1.24)  | 0.59    |
| Sex=female (ref: male)                                                              | 1.00 (0.91, 1.10)      | 0.94    | 1.00 (0.91, 1.10)  | 0.94    |
| Cohort = CODA (ref: AHEAD)                                                          | 0.92 (0.73, 1.16)      | 0.48    | 0.92 (0.73, 1.16)  | 0.48    |
| Cohort = HRS (ref: AHEAD)                                                           | 0.83 (0.62, 1.11)      | 0.21    | 0.83 (0.62, 1.11)  | 0.21    |
| Cohort = WB (ref: AHEAD)                                                            | 0.73 (0.49, 1.08)      | 0.12    | 0.73 (0.49, 1.08)  | 0.12    |
| Cohort = BB (ref: AHEAD)                                                            | 0.77 (0.48, 1.23)      | 0.27    | 0.77 (0.48, 1.23)  | 0.27    |
| Race and ethnicity = Non-Hispanic Black (ref: Hispanic)                             | 0.84 (0.70, 1.02)      | 0.08    | 0.84 (0.70, 1.02)  | 0.08    |
| Race and ethnicity = Non-Hispanic White (ref: Hispanic)                             | 0.84 (0.71, 0.99)      | 0.04    | 0.84 (0.71, 0.99)  | 0.04    |
| Race and ethnicity = Other (ref: Hispanic)                                          | 0.78 (0.56, 1.10)      | 0.15    | 0.78 (0.56, 1.10)  | 0.15    |
| Educational level = 12 (ref: < 12)                                                  | 0.97 (0.85, 1.10)      | 0.64    | 0.97 (0.85, 1.10)  | 0.64    |
| Educational level > 12 (ref: < 12)                                                  | 1.02 (0.89, 1.16)      | 0.79    | 1.02 (0.89, 1.16)  | 0.79    |
| Age at baseline                                                                     | 1.05 (1.03, 1.06)      | <0.001  | 1.05 (1.03, 1.06)  | <0.001  |
| BMI at baseline                                                                     | 1.04 (1.03, 1.05)      | <0.001  | 1.04 (1.03, 1.05)  | <0.001  |
| Hypertension at baseline                                                            | 0.97 (0.88, 1.07)      | 0.59    | 0.97 (0.88, 1.07)  | 0.59    |
| Diabetes at baseline                                                                | 1.20 (1.07, 1.34)      | 0.002   | 1.20 (1.07, 1.34)  | 0.002   |
| Lung disease at baseline                                                            | 1.20 (1.01, 1.42)      | 0.04    | 1.20 (1.01, 1.42)  | 0.04    |
| Heart disease at baseline                                                           | 1.12 (1.00, 1.26)      | 0.04    | 1.12 (1.00, 1.26)  | 0.04    |
| Stroke at baseline                                                                  | 1.16 (0.95, 1.42)      | 0.15    | 1.16 (0.95, 1.42)  | 0.15    |
| Cancer at baseline                                                                  | 1.09 (0.97, 1.24)      | 0.16    | 1.09 (0.97, 1.4)   | 0.16    |
| Psychiatric problems at baseline                                                    | 1.09 (0.94, 1.26)      | 0.27    | 1.09 (0.94, 1.26)  | 0.27    |
| Arthritis at baseline                                                               | 1.57 (1.42, 1.73)      | <0.001  | 1.57 (1.42, 1.73)  | <0.001  |
| CES-D score at baseline                                                             | 1.23 (1.19, 1.27)      | <0.001  | 1.23 (1.19, 1.27)  | <0.001  |
| Smoker at baseline                                                                  | 1.36 (1.19, 1.55)      | <0.001  | 1.36 (1.19, 1.55)  | <0.001  |
| Married vs not married at baseline = not married (ref: married)                     | 0.98 (0.88, 1.10)      | 0.74    | 0.98 (0.88, 1.10)  | 0.74    |
| Total assets at baseline = 2 <sup>nd</sup> quantile (ref: 1 <sup>st</sup> quantile) | 0.92 (0.80, 1.06)      | 0.26    | 0.92 (0.80, 1.06)  | 0.26    |
| Total assets at baseline = 3 <sup>rd</sup> quantile (ref: 1 <sup>st</sup> quantile) | 0.72 (0.62, 0.83)      | <0.001  | 0.72 (0.62, 0.83)  | <0.001  |
| Total assets at baseline = 4 <sup>th</sup> quantile (ref: 1 <sup>st</sup> quantile) | 0.72 (0.61, 0.83)      | <0.001  | 0.72 (0.61, 0.83)  | <0.001  |
| Cognition at baseline                                                               | 0.98 (0.97, 1.00)      | 0.01    | 0.98 (0.97, 1.00)  | 0.01    |

|                                                                                |                    |        |                    |        |
|--------------------------------------------------------------------------------|--------------------|--------|--------------------|--------|
| Social isolation at baseline                                                   | 1.03 (0.94, 1.12)  | 0.53   | 1.03 (0.94, 1.12)  | 0.53   |
| Incident hypertension from baseline to second social isolation measure         | 1.14 (0.98, 1.34)  | 0.10   | 1.14 (0.98, 1.34)  | 0.10   |
| Incident diabetes from baseline to second social isolation measure             | 0.96 (0.78, 1.17)  | 0.67   | 0.96 (0.78, 1.17)  | 0.67   |
| Incident lung disease from baseline to second social isolation measure         | 1.28 (1.01, 1.63)  | 0.05   | 1.28 (1.01, 1.63)  | 0.05   |
| Incident heart disease from baseline to second social isolation measure        | 1.17 (0.99, 1.38)  | 0.07   | 1.17 (0.99, 1.38)  | 0.07   |
| Incident stroke from baseline to second social isolation measure               | 1.45 (1.14, 1.83)  | 0.002  | 1.45 (1.14, 1.83)  | 0.002  |
| Incident cancer from baseline to second social isolation measure               | 1.07 (0.86, 1.33)  | 0.52   | 1.07 (0.86, 1.33)  | 0.52   |
| Incident psychiatric problems from baseline to second social isolation measure | 1.32 (1.03, 1.68)  | 0.03   | 1.32 (1.03, 1.68)  | 0.03   |
| Incident arthritis from baseline to second social isolation measure            | 1.70 (1.46, 1.99)  | <0.001 | 1.70 (1.46, 1.99)  | <0.001 |
| CES-D score change from baseline to second social isolation measure            | 1.20 (1.16, 1.24)  | <0.001 | 1.20 (1.16, 1.24)  | <0.001 |
| Baseline isolation: increased isolation                                        | 1.18 (0.924, 1.50) | 0.19   | 0.85 (0.67, 1.08)  | 0.19   |
| Baseline isolation: decreased isolation                                        | 1.00 (0.789, 1.28) | 0.98   | 0.997 (0.78, 1.27) | 0.98   |

C) The hazard ratios of full covariates on dementia stratified by the social isolation status

|                                                                                     | Baseline Non-isolation |         | Baseline Isolation |         |
|-------------------------------------------------------------------------------------|------------------------|---------|--------------------|---------|
|                                                                                     | aHR (95% CI)           | P value | aHR (95% CI)       | P value |
| Baseline isolation (ref: baseline non-isolation)                                    | 0.85 (0.63, 1.14)      | 0.28    | 1.18 (0.87, 1.59)  | 0.28    |
| Increased isolation (ref: stable)                                                   | 1.29 (1.08, 1.54)      | 0.004   | 1.40 (1.02, 1.93)  | 0.04    |
| Decreased isolation (ref: stable)                                                   | 1.27 (0.94, 1.71)      | 0.12    | 1.27 (0.96, 1.68)  | 0.09    |
| Sex = female (ref: male)                                                            | 1.27 (1.09, 1.48)      | 0.002   | 1.27 (1.09, 1.48)  | 0.002   |
| Cohort = CODA (ref: AHEAD)                                                          | 1.14 (0.86, 1.50)      | 0.37    | 1.14 (0.86, 1.50)  | 0.37    |
| Cohort = HRS (ref: AHEAD)                                                           | 1.08 (0.71, 1.64)      | 0.71    | 1.08 (0.71, 1.64)  | 0.71    |
| Cohort = WB (ref: AHEAD)                                                            | 0.47 (0.25, 0.88)      | 0.02    | 0.47 (0.25, 0.88)  | 0.02    |
| Cohort = BB (ref: AHEAD)                                                            | 0.55 (0.26, 1.16)      | 0.12    | 0.55 (0.26, 1.16)  | 0.12    |
| Race and ethnicity = Non-Hispanic Black (ref: Hispanic)                             | 1.73 (1.21, 2.47)      | 0.003   | 1.73 (1.21, 2.47)  | 0.003   |
| Race and ethnicity = Non-Hispanic White (ref: Hispanic)                             | 1.66 (1.20, 2.31)      | 0.002   | 1.66 (1.20, 2.31)  | 0.002   |
| Race and ethnicity = Other (ref: Hispanic)                                          | 1.42 (0.76, 2.63)      | 0.27    | 1.42 (0.76, 2.63)  | 0.27    |
| Educational level = 12 (ref: < 12)                                                  | 1.20 (0.99, 1.46)      | 0.06    | 1.20 (0.99, 1.46)  | 0.06    |
| Educational level > 12 (ref: < 12)                                                  | 1.30 (1.05, 1.60)      | 0.02    | 1.30 (1.05, 1.60)  | 0.02    |
| Age at baseline                                                                     | 1.07 (1.05, 1.10)      | <0.001  | 1.07 (1.05, 1.10)  | <0.001  |
| BMI at baseline                                                                     | 0.98 (0.96, 0.99)      | 0.001   | 0.98 (0.96, 0.99)  | 0.001   |
| Hypertension at baseline                                                            | 1.01 (0.86, 1.18)      | 0.91    | 1.01 (0.86, 1.18)  | 0.91    |
| Diabetes at baseline                                                                | 1.34 (1.13, 1.59)      | 0.001   | 1.34 (1.13, 1.59)  | 0.001   |
| Lung disease at baseline                                                            | 0.88 (0.70, 1.12)      | 0.31    | 0.88 (0.70, 1.12)  | 0.31    |
| Heart disease at baseline                                                           | 1.00 (0.84, 1.17)      | 0.95    | 1.00 (0.84, 1.17)  | 0.95    |
| Stroke at baseline                                                                  | 1.46 (1.16, 1.83)      | 0.001   | 1.46 (1.16, 1.83)  | 0.001   |
| Cancer at baseline                                                                  | 0.90 (0.75, 1.08)      | 0.25    | 0.90 (0.75, 1.08)  | 0.25    |
| Psychiatric problems at baseline                                                    | 1.48 (1.20, 1.83)      | <0.001  | 1.48 (1.20, 1.83)  | <0.001  |
| Arthritis at baseline                                                               | 1.02 (0.87, 1.21)      | 0.78    | 1.02 (0.87, 1.21)  | 0.78    |
| CES-D score at baseline                                                             | 1.10 (1.05, 1.15)      | <0.001  | 1.10 (1.05, 1.15)  | <0.001  |
| Smoker at baseline                                                                  | 1.36 (1.08, 1.71)      | 0.009   | 1.36 (1.08, 1.71)  | 0.009   |
| Married vs not married at baseline = not married (ref: married)                     | 0.84 (0.70, 1.00)      | 0.05    | 0.84 (0.70, 1.00)  | 0.05    |
| ADL at baseline                                                                     | 1.09 (1.00, 1.18)      | 0.04    | 1.09 (1.00, 1.18)  | 0.04    |
| Total assets at baseline = 2 <sup>nd</sup> quantile (ref: 1 <sup>st</sup> quantile) | 1.05 (0.83, 1.34)      | 0.67    | 1.05 (0.83, 1.34)  | 0.67    |
| Total assets at baseline = 3 <sup>rd</sup> Quantile (ref: 1 <sup>st</sup> quantile) | 0.93 (0.73, 1.18)      | 0.54    | 0.93 (0.73, 1.18)  | 0.54    |
| Total assets at baseline = 4 <sup>th</sup> Quantile (ref: 1 <sup>st</sup> quantile) | 0.89 (0.69, 1.15)      | 0.39    | 0.89 (0.69, 1.15)  | 0.39    |

|                                                                                |                      |        |                   |        |
|--------------------------------------------------------------------------------|----------------------|--------|-------------------|--------|
| Cognition at baseline                                                          | 0.92 (0.90, 0.94)    | <0.001 | 0.92 (0.90, 0.94) | <0.001 |
| Social isolation at baseline                                                   | 1.02 (0.88, 1.17)    | 0.80   | 1.02 (0.88, 1.17) | 0.80   |
| Incident hypertension from baseline to second social isolation measure         | 1.04 (0.79, 1.37)    | 0.78   | 1.04 (0.79, 1.37) | 0.78   |
| Incident diabetes from baseline to second social isolation measure             | 1.11 (0.81, 1.52)    | 0.50   | 1.11 (0.81, 1.52) | 0.50   |
| Incident lung disease from baseline to second social isolation measure         | 0.59 (0.37, 0.92)    | 0.02   | 0.59 (0.37, 0.92) | 0.02   |
| Incident heart disease from baseline to second social isolation measure        | 1.08 (0.85, 1.38)    | 0.51   | 1.08 (0.85, 1.38) | 0.51   |
| Incident stroke from baseline to second social isolation measure               | 1.49 (1.09, 2.02)    | 0.01   | 1.49 (1.09, 2.02) | 0.01   |
| Incident cancer from baseline to second social isolation measure               | 1.08 (0.78, 1.49)    | 0.64   | 1.08 (0.78, 1.49) | 0.64   |
| Incident psychiatric problems from baseline to second social isolation measure | 1.61 (1.12, 2.32)    | 0.01   | 1.61 (1.12, 2.32) | 0.01   |
| Incident arthritis from baseline to second social isolation measure            | 1.08 (0.80, 1.46)    | 0.61   | 1.08 (0.80, 1.46) | 0.61   |
| CES-D score change from baseline to second social isolation measure            | 1.084 (1.026, 1.144) | 0.004  | 1.08 (1.03, 1.14) | 0.004  |
| Baseline isolation: increased isolation                                        | 1.084 (0.751, 1.567) | 0.67   | 0.92 (0.64, 1.33) | 0.67   |
| Baseline isolation: decreased isolation                                        | 1.001 (0.672, 1.491) | 1.00   | 1.00 (0.67, 1.49) | 1.00   |
