# Supplementary material for: Social Isolation Changes and Long-Term Outcomes Among Older Adults
Source: PubMed Central journal article supplement (PMC11270134; doi:10.1001/jamanetworkopen.2024.24519), 2024-07-24
Supplement: jamanetwopen-e2424519-s002.pdf [file jamanetwopen-e2424519-s002.pdf]

## Data Sharing Statement

Lyu. Social Isolation Changes and Long-Term Outcomes Among Older Adults. *JAMA Netw Open*. Published July 24, 2024. doi:10.1001/jamanetworkopen.2024.24519

### Data

**Data available:** No

### Additional Information

**Explanation for why data not available:** The Health and Retirement Study (HRS) is partly public available through their website, the restricted HRS data can be obtained by application.
